# Supplementary material
Source: PubMed Central journal article supplement (PMC6436029)
Supplement: Supp_Fig1.pdf [file Supp_Fig1.pdf]

## Supplementary Data

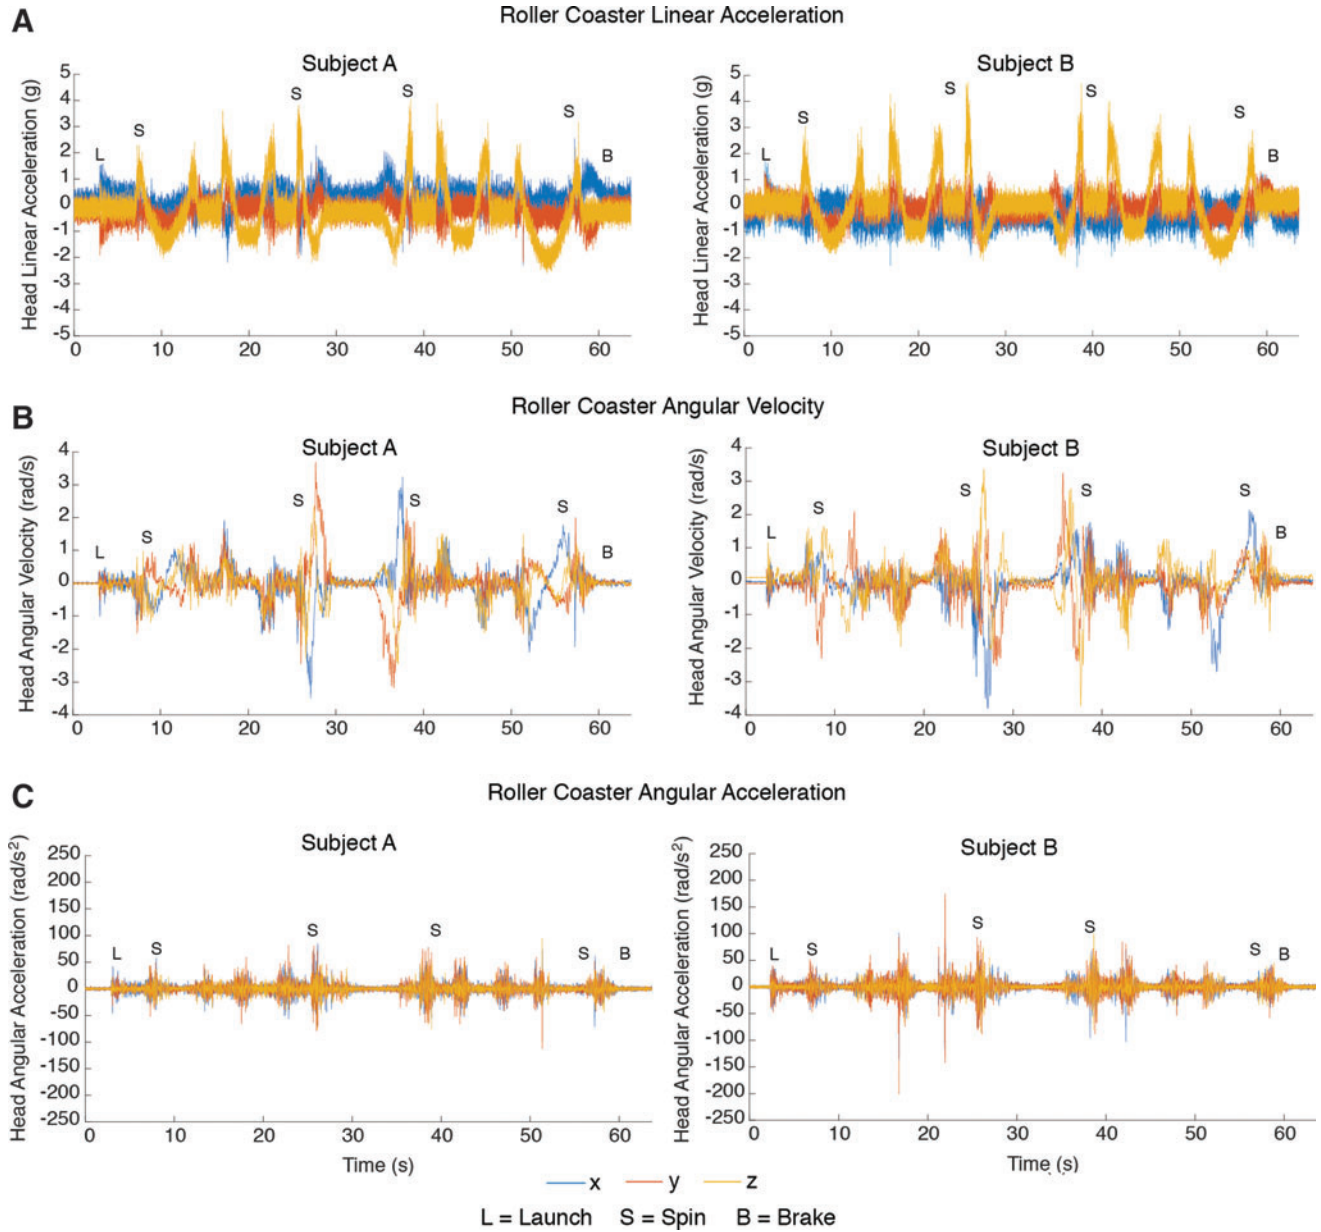

**SUPPLEMENTARY FIG. S1.** Representative kinematic traces from ride 3 for both subjects. **(A)** Triaxial linear accelerations, **(B)** triaxial angular velocities, and **(C)** triaxial angular accelerations obtained through differentiation demonstrate that both subjects experienced comparable, yet not identical, kinematics when participating in the same roller coaster ride.
