# Supplementary material
Source: PubMed Central journal article supplement (PMC6436029)
Supplement: Supp_Table1.pdf [file Supp_Table1.pdf]

SUPPLEMENTARY TABLE S1. IMPACT KINEMATICS AND EXPOSURE

|           |               | Kinematics               |                           |                           | Impact Exposure   |                                    |                         | Predicted Brain Measures            |                             |
|-----------|---------------|--------------------------|---------------------------|---------------------------|-------------------|------------------------------------|-------------------------|-------------------------------------|-----------------------------|
|           |               | Peak Linear Acceleration | $\Delta$ Angular Velocity | Peak Angular Acceleration | Number of Impacts | Average Impact Linear Acceleraiton | Maximum Impact Duration | $\Delta$ Brain Surface Displacement | Peak Brain Surface Velocity |
| Subject A | Ride 1        | 4.1g                     | 7.0 rad/s                 | 200 rad/s <sup>2</sup>    | 41                | 3.4 ± 0.3g                         | 103ms                   | 2.3mm                               | 96mm/s                      |
|           | Ride 2        | 6.7g                     | 7.3 rad/s                 | 210 rad/s <sup>2</sup>    | 45                | 4.0 ± 0.8g                         | 106ms                   | 3.6mm                               | 97mm/s                      |
|           | Ride 3        | 4.3g                     | 6.2 rad/s                 | 150 rad/s <sup>2</sup>    | 31                | 3.5 ± 0.4g                         | 63ms                    | 2.1mm                               | 74mm/s                      |
|           | Running       | 2.4g                     | 3.3 rad/s                 | 70 rad/s <sup>2</sup>     | 0                 | --                                 | --                      | 0.7mm                               | 52mm/s                      |
|           | Soccer Header | 10g                      | 5.6 rad/s                 | 1100 rad/s <sup>2</sup>   | --                | --                                 | --                      | 4.2mm                               | 100mm/s                     |
| Subject B | Ride 1        | 6.3g                     | 7.3 rad/s                 | 230 rad/s <sup>2</sup>    | 113               | 3.7 ± 0.7g                         | 327ms                   | 3.3mm                               | 89mm/s                      |
|           | Ride 2        | 8.0g                     | 9.9 rad/s                 | 290 rad/s <sup>2</sup>    | 117               | 4.1 ± 1.0g                         | 162ms                   | 4.0mm                               | 97mm/s                      |
|           | Ride 3        | 5.0g                     | 6.3 rad/s                 | 240 rad/s <sup>2</sup>    | 52                | 3.6 ± 0.5g                         | 174ms                   | 2.0mm                               | 71mm/s                      |
|           | Running       | 3.6g                     | 3.7 rad/s                 | 70 rad/s <sup>2</sup>     | 23                | 3.2 ± 0.1g                         | 123ms                   | 1.5mm                               | 64mm/s                      |
|           | Soccer Header | --                       | --                        | --                        | --                | --                                 | --                      | --                                  | --                          |
|           | Football      | 22g                      | 8.1 rad/s                 | 930 rad/s <sup>2</sup>    | --                | --                                 | --                      | 3.2mm                               | 252mm/s                     |

Peak linear accelerations, changes in angular velocity, peak angular accelerations, number of impacts, and brain surface displacements for Subjects A and B during three roller coaster rides, running, and average soccer headers, and, for comparison, during 10th percentile football impact.
