# Supplementary material
Source: PubMed Central journal article supplement (PMC6436029)
Supplement: Supp_Table2.pdf [file Supp_Table2.pdf]

SUPPLEMENTARY TABLE S2. SENSITIVITY OF MAXIMUM BRAIN STRAINS WITH RESPECT TO VARYING BRAIN STIFFNESS AND SIMULATION DURATION AS PREDICTED BY FINITE ELEMENT SIMULATION

|               |                 | <b>100%<br/>Stiffness<br/>100ms<br/>Duration</b> | <b>50%<br/>Stiffness<br/>100ms<br/>Duration</b> | <b>200%<br/>Stiffness<br/>100ms<br/>Duration</b> | <b>100%<br/>Stiffness<br/>140ms<br/>Duration</b> | <b>100%<br/>Stiffness<br/>180ms<br/>Duration</b> |
|---------------|-----------------|--------------------------------------------------|-------------------------------------------------|--------------------------------------------------|--------------------------------------------------|--------------------------------------------------|
| <b>Ride 1</b> | <b>Strain</b>   | 0.014                                            | 0.032                                           | 0.007                                            | 0.011                                            | 0.010                                            |
|               | <b>% Change</b> | 100%                                             | 228.6%                                          | 50%                                              | 78.6%                                            | 71.4%                                            |
| <b>Ride 2</b> | <b>Strain</b>   | 0.022                                            | 0.040                                           | 0.008                                            | 0.034                                            | 0.025                                            |
|               | <b>% Change</b> | 100%                                             | 181.8%                                          | 36.4%                                            | 154.6%                                           | 113.6%                                           |
| <b>Ride 3</b> | <b>Strain</b>   | 0.035                                            | 0.066                                           | 0.014                                            | 0.024                                            | 0.023                                            |
|               | <b>% Change</b> | 100%                                             | 188.6%                                          | 40.0%                                            | 68.6%                                            | 65.7%                                            |
