# Supplementary material
Source: PubMed Central journal article supplement (PMC6436029)
Supplement: Supp_Table3.pdf [file Supp_Table3.pdf]

SUPPLEMENTARY TABLE S3. SENSITIVITY OF MAXIMUM BRAIN DISPLACEMENTS WITH RESPECT TO VARYING  
BRAIN STIFFNESS AND BRAIN MASS AS PREDICTED BY RIGID BODY SIMULATION

|               |                     | <b>100%<br/>Stiffness<br/>100%<br/>Mass</b> | <b>80%<br/>Stiffness<br/>100%<br/>Mass</b> | <b>120%<br/>Stiffness<br/>100%<br/>Mass</b> | <b>100%<br/>Stiffness<br/>80%<br/>Mass</b> | <b>100%<br/>Stiffness<br/>120%<br/>Mass</b> |
|---------------|---------------------|---------------------------------------------|--------------------------------------------|---------------------------------------------|--------------------------------------------|---------------------------------------------|
| <b>Ride 1</b> | <b>Displacement</b> | 1.7mm                                       | 2.1mm                                      | 1.4mm                                       | 1.3mm                                      | 2.0mm                                       |
|               | <b>% Change</b>     | 100%                                        | 123.5%                                     | 82.3%                                       | 75.5%                                      | 118%                                        |
| <b>Ride 2</b> | <b>Displacement</b> | 1.2mm                                       | 1.5mm                                      | 1.0mm                                       | 1.0mm                                      | 1.5mm                                       |
|               | <b>% Change</b>     | 100%                                        | 125.0%                                     | 83.3%                                       | 83.3%                                      | 125.0%                                      |
| <b>Ride 3</b> | <b>Displacement</b> | 1.8mm                                       | 2.2mm                                      | 1.5mm                                       | 1.4mm                                      | 2.2mm                                       |
|               | <b>% Change</b>     | 100%                                        | 122.2%                                     | 83.3%                                       | 77.8%%                                     | 122%                                        |
